# Supplementary material for: The Role of Synaptopodin in Membrane Protein Diffusion in the Dendritic Spine Neck
Source: PubMed Central journal article supplement (PMC4739495; doi:10.1371/journal.pone.0148310), 2016-02-03
Supplement: pone.0148310.s001.pdf [file pone.0148310.s001.pdf]

# **S1 Supporting information**

## **The Role of Synaptopodin in Membrane Protein Diffusion in the Dendritic Spine Neck**

Lili Wang<sup>1</sup>, Andréa Dumoulin<sup>1</sup>, Marianne Renner<sup>1</sup>, Antoine Triller<sup>1\*</sup>, Christian G Specht<sup>1</sup>

<sup>1</sup> Biologie Cellulaire de la Synapse, Inserm U1024, CNRS 8197, Institute of Biology,  
Ecole Normale Supérieure (ENS), Paris, France

\* Corresponding author: E-mail: [triller@biologie.ens.fr](mailto:triller@biologie.ens.fr) (AT)

### **Contents:**

**Figures A-E**

**Tables A-E**

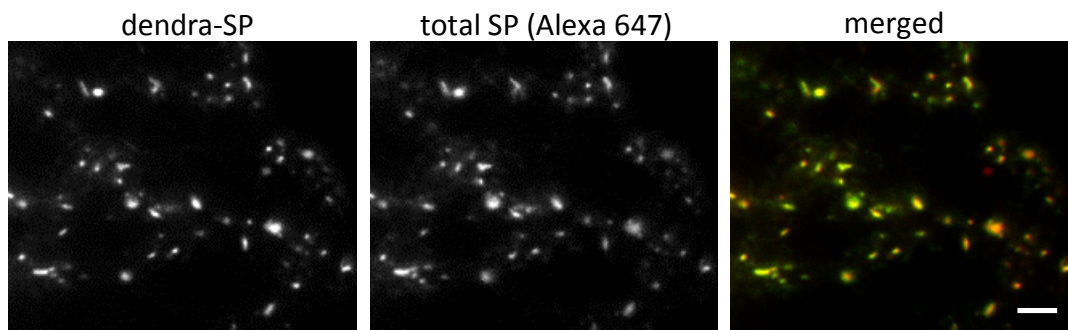

**Figure A. Distribution of lentivirus expressed dendra-SP.** Hippocampal neurons were infected at DIV 7 and fixed at DIV 20, followed by immunolabelling of SP using Alexa Fluor 647-conjugated secondary antibody. The distribution of recombinant dendra-SP (green) matches the total SP staining (= dendra-SP + endogenous SP, red), indicating that both proteins occupy the same sub-cellular compartments. Scale bar: 500 nm.

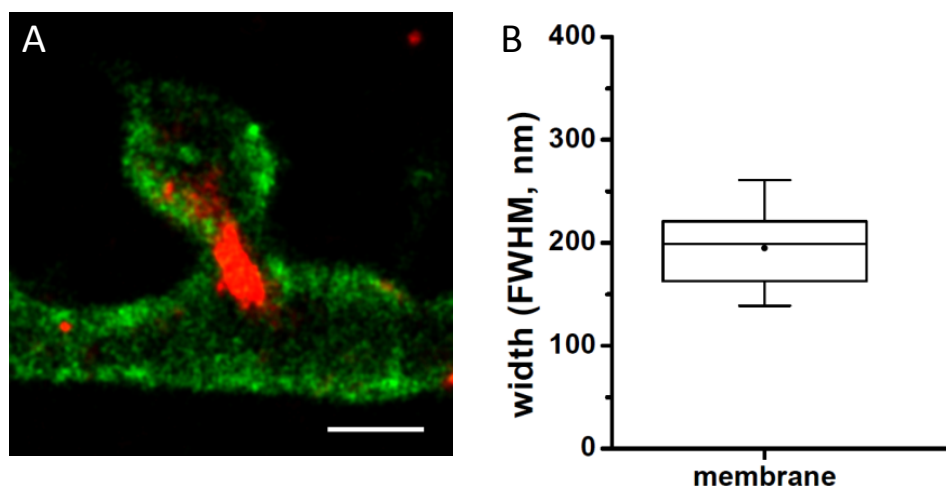

**Figure B. SP distribution within the spine neck.** (A) Hippocampal neurons that had been co-transfected with dendra-SP and TMD-pHluorin plasmids at DIV 9 were labelled with primary antibodies against GFP tagged with Alexa-Fluor 647 fluorophores and imaged by dual-colour STORM/PALM. (B) Quantification of the outer spine neck diameter was based on the distribution of single molecule detections of the membrane probe in a 200 nm wide segment across the spine neck (measured as the full width at half maximum, FWHM,  $n = 18$  spines from two neurons). Scale bar: 500 nm.

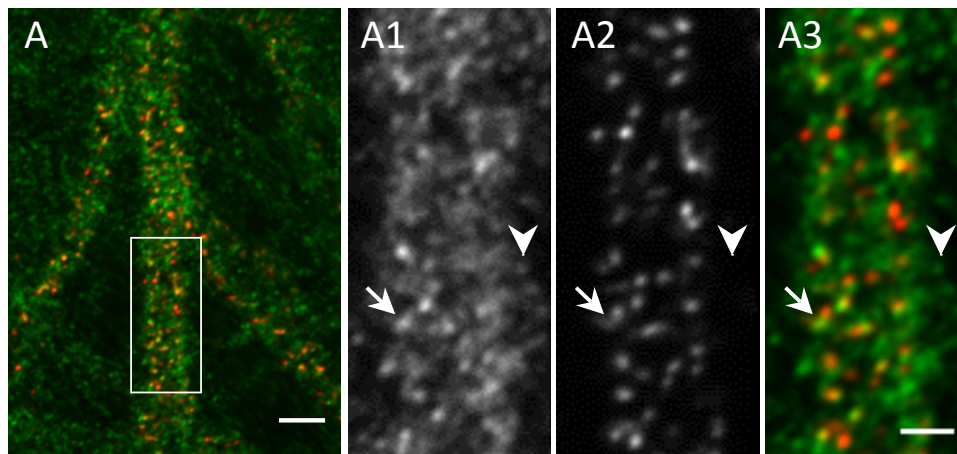

**Figure C. Overlapping localisation of mGluR5 and SP in dendritic spines.** Hippocampal neurons were immunolabelled with specific antibodies against SP (shown in red) and mGluR5 (green; monoclonal mouse anti rat mGluR5b, 1:1000, clone N75/33, NeuroMab, UC Davis/NIH). Endogenous mGluR5 is distributed widely, with a preference for the spine head of SP-positive spines (arrows) and somewhat less for SP-negative spines (arrowheads). We observed no specific accumulation of mGluR5 in the spine neck, arguing against a direct interaction with endogenous SP. Scale bars: 5  $\mu\text{m}$  in A, 2  $\mu\text{m}$  in A1-3.

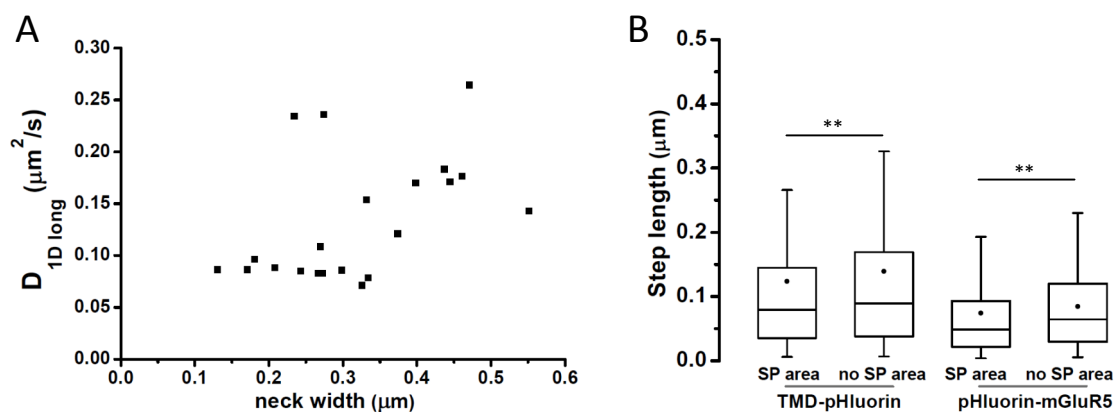

**Figure D. Role of neck width and SP for membrane protein diffusion in the spine neck.** (A) Correlation between longitudinal diffusion coefficients of pHluorin-mGluR5 and the spine neck diameter (measured as the width of QD detections in the neck region). (B) Step size analysis of TMD-pHluorin and pHluorin-mGluR5 in regions containing SP or without SP within the same spine necks. The longitudinal step length was calculated for 60 ms intervals (5 frames of 12 ms) and was found to be significantly smaller in SP areas of the spine neck compared to no SP areas (TMD-pHluorin: SP area, 124  $\pm$  11 nm mean  $\pm$  SEM; no SP, 139  $\pm$  12 nm; pHluorin-mGluR5: SP area, 74  $\pm$  4 nm; no SP, 85  $\pm$  1 nm;  $n > 3800$ , \*\*  $p < 0.01$ , MW).

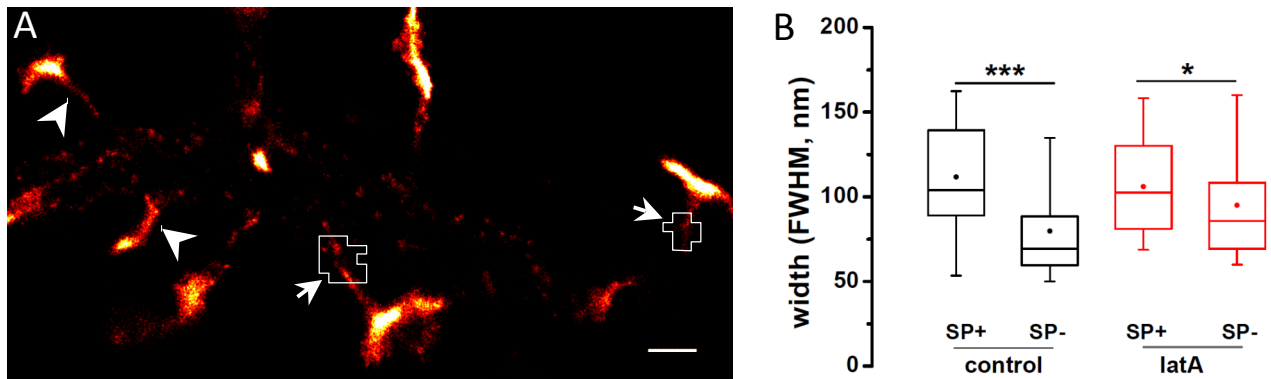

**Figure E. Organisation of the actin cytoskeleton in SP+ and SP- spines.** (A) PALM experiments were done in hippocampal neurons expressing the photo-convertible actin probe ABP-tdEosFP (Izeddin et al. 2011, PLoS One). SP- (arrowhead) and SP+ spines (arrows) were distinguished on the basis of co-transfected mRFP-SP by conventional fluorescence microscopy (white boxes). Note that the red mRFP fluorescence was bleached prior to PALM imaging of ABP-tdEosFP. Scale bar: 500 nm. (B) Quantification of the width of the actin domain (FWHM of single molecule detections in 200 nm wide segments across the spine neck) in SP-positive and SP-negative spines of the same neurons, under control conditions and after 5 min latA treatment. The width of SP- spines was consistently smaller than that of SP+ spines (control: SP+,  $112 \pm 6$  nm, mean  $\pm$  SEM,  $n = 44$ ; SP-,  $80 \pm 6$  nm,  $n = 29$ ; latA: SP+,  $106 \pm 5$  nm,  $n = 39$ ; SP-,  $95 \pm 10$  nm,  $n = 24$ ; \*  $p < 0.05$ , \*\*\*  $p < 0.001$ , MW).

**Table A. Fluorescence microscopy data.** Quantification of SP distribution in dendritic spines in hippocampal neurons.

| Condition | n<br>(spines counted) | Spines with SP |            |             |             |            |
|-----------|-----------------------|----------------|------------|-------------|-------------|------------|
|           |                       | location       | n          | SD          | percent (%) | SD (%)     |
| Endo-SP   | 998                   | neck           | 688        | 14.6        | 68.9        | 1.5        |
|           |                       | head           | 148        | 11.2        | 14.8        | 1.1        |
|           |                       | base           | 32         | 5.6         | 3.2         | 0.6        |
|           |                       | <b>total</b>   | <b>868</b> | <b>10.6</b> | <b>87.0</b> | <b>1.1</b> |
| mRFP-SP   | 965                   | neck           | 647        | 14.6        | 67.0        | 1.5        |
|           |                       | head           | 157        | 11.5        | 16.3        | 1.2        |
|           |                       | base           | 33         | 5.6         | 3.4         | 0.6        |
|           |                       | <b>total</b>   | <b>837</b> | <b>10.5</b> | <b>86.7</b> | <b>1.1</b> |

**Table B. Fluorescence microscopy data.** Effect of 4AP on SP clusters.

| Condition                             | n<br>(clusters) | Mean  | SEM   | Median | 25%<br>quartile | 75%<br>quartile | Mann Whitney U Test<br>(control <i>versus</i> 4AP) |
|---------------------------------------|-----------------|-------|-------|--------|-----------------|-----------------|----------------------------------------------------|
|                                       |                 |       |       |        |                 |                 |                                                    |
|                                       | 4AP             | 3.558 | 0.062 | 3.451  | 3.008           | 4.080           |                                                    |
| normalized<br>SP intensity            | control         | 1.060 | 0.025 | 1      | 0.832           | 1.232           | p<0.001                                            |
|                                       | 4AP             | 0.886 | 0.024 | 0.824  | 0.696           | 1.010           |                                                    |
| normalized<br>phalloidin<br>intensity | control         | 1.083 | 0.028 | 1      | 0.825           | 1.331           | p<0.001                                            |
|                                       | 4AP             | 0.864 | 0.031 | 0.793  | 0.658           | 0.970           |                                                    |

**Table C. STORM/PALM data.** Distribution of SP and F-actin in the spine neck (full width at half maximum, FWHM; nm).

| FWHM<br>Condition | N<br>(spines) | Domain     | Mean   | SEM  | Median | 25%<br>quartile | 75%<br>quartile | Mann Whitney U Test |                      |         |
|-------------------|---------------|------------|--------|------|--------|-----------------|-----------------|---------------------|----------------------|---------|
|                   |               |            |        |      |        |                 |                 | phalloidin vs SP    | control vs treatment |         |
| control           | 34            | phalloidin | 105.44 | 4.28 | 105    | 85              | 125             | p<0.001             | phalloidin           | SP      |
|                   |               | SP         | 65.58  | 3.41 | 70     | 50              | 80              |                     |                      |         |
| 4AP               | 29            | phalloidin | 104.13 | 5.31 | 100    | 85              | 110             | p<0.001             | p=0.652              | p=0.101 |
|                   |               | SP         | 76.37  | 4.66 | 75     | 65              | 90              |                     |                      |         |
| Latrunculin A     | 33            | phalloidin | 100.00 | 4.01 | 100    | 85              | 115             | p<0.01              | p=0.373              | p<0.001 |
|                   |               | SP         | 84.09  | 3.11 | 85     | 70              | 95              |                     |                      |         |

**Table D. SPT data.** Diffusion coefficient  $D_{IDlong}$  ( $\mu\text{m}^2/\text{s}$ ) of membrane constructs in spine neck.

| Molecules       | Area in spines    | n<br>(trajectories) | Mean  | SEM    | Median | 25%<br>quartile | 75%<br>quartile | Kolmogorov-Smirnov test |                                |
|-----------------|-------------------|---------------------|-------|--------|--------|-----------------|-----------------|-------------------------|--------------------------------|
|                 |                   |                     |       |        |        |                 |                 | spine SP (+)            | no SP area<br>SP (+) vs SP (-) |
| GFP-GPI         | in SP area SP (+) | 164                 | 0.247 | 0.0131 | 0.197  | 0.102           | 0.357           | p=0.063                 | p=0.118                        |
|                 | no SP area SP (+) | 170                 | 0.232 | 0.0107 | 0.216  | 0.097           | 0.306           |                         |                                |
|                 | SP (-)            | 268                 | 0.256 | 0.0091 | 0.206  | 0.112           | 0.355           |                         |                                |
| TMD-pHluorin    | in SP area SP (+) | 58                  | 0.168 | 0.0119 | 0.153  | 0.104           | 0.203           | p=0.551                 | p<0.01                         |
|                 | no SP area SP (+) | 57                  | 0.203 | 0.0180 | 0.17   | 0.132           | 0.241           |                         |                                |
|                 | SP (-)            | 68                  | 0.270 | 0.0210 | 0.22   | 0.152           | 0.356           |                         |                                |
| pHluorin-mGluR5 | in SP area SP (+) | 123                 | 0.070 | 0.0054 | 0.051  | 0.027           | 0.105           | p<0.001                 | p<0.05                         |
|                 | no SP area SP (+) | 105                 | 0.096 | 0.0054 | 0.082  | 0.057           | 0.122           |                         |                                |
|                 | SP(-)             | 89                  | 0.122 | 0.0077 | 0.115  | 0.073           | 0.154           |                         |                                |

**Table E. SPT data.** Diffusion coefficient  $D_{1D\text{long}}$  ( $\mu\text{m}^2/\text{s}$ ) of pHluorin-mGluR5 in control condition and pharmacological treatments.

| $D_{1D\text{long}}$<br>Condition | Area in spines    | n<br>(trajectories) | Mean  | SEM    | Median | 25%<br>quartile | 75%<br>quartile | Kolmogorov-Smirnov test          |                                |                      |                  |                        |
|----------------------------------|-------------------|---------------------|-------|--------|--------|-----------------|-----------------|----------------------------------|--------------------------------|----------------------|------------------|------------------------|
|                                  |                   |                     |       |        |        |                 |                 | spine SP (+)<br>in vs no SP area | no SP area<br>SP (+) vs SP (-) | control vs treatment |                  |                        |
|                                  |                   |                     |       |        |        |                 |                 | SP (+) spine                     | no SP                          | spine SP (-)         |                  |                        |
| control                          | in SP area SP (+) | 123                 | 0.070 | 0.0054 | 0.051  | 0.027           | 0.105           | p<0.001                          | p<0.05                         | in SP<br>p<0.001     | no SP<br>p=0.275 | spine SP (-)<br>p<0.01 |
|                                  | no SP area SP (+) | 105                 | 0.096 | 0.0054 | 0.082  | 0.057           | 0.122           |                                  |                                |                      |                  |                        |
|                                  | SP (-)            | 89                  | 0.122 | 0.0077 | 0.115  | 0.073           |                 |                                  |                                |                      |                  |                        |
| 4AP                              | in SP area SP (+) | 135                 | 0.082 | 0.0045 | 0.072  | 0.044           | 0.108           | p<0.01                           | p<0.001                        | p<0.001              | p=0.275          | p<0.01                 |
|                                  | no SP area SP (+) | 293                 | 0.116 | 0.0049 | 0.091  | 0.056           | 0.146           |                                  |                                |                      |                  |                        |
|                                  | SP (-)            | 247                 | 0.160 | 0.0066 | 0.138  | 0.091           |                 |                                  |                                |                      |                  |                        |
| Latrunculin A<br>5-10 min        | in SP area SP (+) | 211                 | 0.115 | 0.0053 | 0.091  | 0.059           | 0.152           | p=0.094                          | p<0.001                        | p<0.001              | p=0.616          | p=0.071                |
|                                  | no SP area SP (+) | 396                 | 0.110 | 0.0043 | 0.089  | 0.056           | 0.135           |                                  |                                |                      |                  |                        |
|                                  | SP (-)            | 439                 | 0.140 | 0.0045 | 0.112  | 0.076           |                 |                                  |                                |                      |                  |                        |
| Latrunculin A<br>15-20 min       | in SP area SP (+) | 92                  | 0.129 | 0.0083 | 0.115  | 0.072           | 0.172           | p=0.309                          | p=0.375                        | p<0.001              | p<0.01           | p<0.05                 |
|                                  | no SP area SP (+) | 262                 | 0.133 | 0.0066 | 0.096  | 0.056           | 0.197           |                                  |                                |                      |                  |                        |
|                                  | SP (-)            | 359                 | 0.137 | 0.0054 | 0.104  | 0.058           |                 |                                  |                                |                      |                  |                        |
